# Supplementary material
Source: MDPI journal article supplement (https://www.mdpi.com/2073-4352/11/10/1189)
Supplement: s1 [file s1]

# Overview of Gemstone Resources in China

Xiao-Yan Yu <sup>1,\*</sup>, Zheng-Yu Long <sup>1</sup>, Yi Zhang <sup>1</sup>, Li-Jie Qin <sup>1</sup>, Cun Zhang <sup>1,2</sup>, Zhi-Rong Xie <sup>1</sup>, Yu-Rui Wu <sup>1</sup>, Ying Yan <sup>1</sup>, Ming-Ke Wu <sup>1</sup> and Jia-Xin Wan <sup>1</sup>

<sup>1</sup> School of Gemology, China University of Geosciences Beijing, 29 Xueyuan Road, Beijing 100083, China

<sup>2</sup> School of Materials Science and Engineering, Qilu University of Technology (Shandong Academy of Sciences), Jinan, 250353, China

\* Correspondence: yuxy@cugb.edu.cn

## Supplementary Materials

**Table S1.** Statistics of chemical compositions of emeralds in China (wt.%).

|                                | Davdar of Xinjiang |       |       |       | Dayakou of Yunnan |       |       |       |
|--------------------------------|--------------------|-------|-------|-------|-------------------|-------|-------|-------|
|                                | XJ1                | XJ2   | XJ3   | XJ4   | YN17              | YN1   | YN46  | YN65  |
| SiO <sub>2</sub>               | 66.29              | 65.52 | 65.37 | 65.72 | 66.69             | 66.35 | 66.06 | 66.15 |
| TiO <sub>2</sub>               | 0.01               | 0.02  | 0.02  | 0.01  | n.d.              | n.d.  | n.d.  | n.d.  |
| Al <sub>2</sub> O <sub>3</sub> | 17.18              | 16.86 | 16.74 | 16.43 | 14.47             | 17.38 | 15.88 | 16.44 |
| Sc <sub>2</sub> O <sub>3</sub> | 0.02               | 0.02  | 0.02  | 0.12  | n.d.              | n.d.  | 0.04  | 0.02  |
| V <sub>2</sub> O <sub>3</sub>  | 0.21               | 0.22  | 0.23  | 0.25  | 0.05              | 0.29  | 0.72  | 0.73  |
| Cr <sub>2</sub> O <sub>3</sub> | 0.18               | 0.17  | 0.17  | 0.54  | 0.05              | 0.06  | 0.04  | 0.04  |
| BeO                            | n.d.               | n.d.  | n.d.  | n.d.  | n.d.              | 13.59 | n.d.  | n.d.  |
| MgO                            | 0.72               | 0.86  | 0.95  | 1.03  | 2.07              | 0.78  | 0.95  | 1.22  |
| CaO                            | 0.00               | 0.00  | 0.00  | 0.00  | 0.01              | 0.01  | 0.00  | 0.02  |
| MnO                            | 0.03               | 0.02  | 0.03  | 0.03  | 0.02              | 0.00  | 0.00  | 0.00  |
| FeO                            | 0.27               | 0.32  | 0.39  | 0.17  | 0.37              | 0.32  | 0.34  | 0.50  |
| Na <sub>2</sub> O              | 0.49               | 0.57  | 0.65  | 0.63  | 0.95              | 0.18  | 0.71  | 0.80  |
| K <sub>2</sub> O               | 0.00               | 0.00  | 0.01  | 0.04  | 0.03              | 0.01  | 0.03  | 0.03  |
| Total                          | 85.4               | 84.58 | 84.58 | 84.97 | 84.71             | 98.97 | 84.77 | 85.95 |
| Data source                    | [1]                |       |       |       | [2]               | [3]   | [4]   | [5]   |

n.d. = not detected.

**Table S2.** Representative EPMA of various gem-quality minerals from China.

|                                | Ruby                 | Sapphire            | Tourmaline      | Olivine     |             |                   |                   |
|--------------------------------|----------------------|---------------------|-----------------|-------------|-------------|-------------------|-------------------|
|                                | Baicheng of Xinjiang | Changle of Shandong | Fuping of Hebei | Xinjiang    | Yunnan      | Songshan of Jilin | Damaping of Hebei |
| SiO <sub>2</sub>               | n.d.                 | 0.02–0.71           | 0.04–0.05       | 37.01–36.56 | 37.86–40.94 | 40.96–41.92       | 41.00–42.45       |
| TiO <sub>2</sub>               | n.d.                 | 0.03–0.07           | n.d.            | n.d.        | n.d.        | 0.00–0.06         | 0.00–0.02         |
| Al <sub>2</sub> O <sub>3</sub> | 98.47–99.30          | 97.67–98.88         | 96.20–98.58     | 30.88–40.10 | 36.59–41.53 | 0.00–0.02         | 0.00–0.04         |
| V <sub>2</sub> O <sub>5</sub>  | 0.04–0.14            | n.d.                | n.d.            | n.d.        | n.d.        | n.d.              | n.d.              |
| P <sub>2</sub> O <sub>5</sub>  | n.d.                 | n.d.                | n.d.            | n.d.        | n.d.        | n.d.              | n.d.              |
| Cr <sub>2</sub> O <sub>3</sub> | 0.12–0.62            | 0.00–0.04           | 0.17–0.32       | n.d.        | n.d.        | 0.00–0.01         | 0.00–0.13         |
| MgO                            | n.d.                 | n.d.                | n.d.            | n.d.        | 0.02–0.16   | 48.26–49.74       | 48.78–50.84       |
| CaO                            | 0.01–0.02            | 0.02–0.06           | n.d.            | 0.05–0.36   | n.d.        | 0.01–0.04         | 0.00–0.08         |
| MnO                            | 0.01–0.06            | 0.02–0.13           | 0.02–0.14       | 0.28–2.47   | 0.32–0.34   | 0.14–0.17         | 0.10–0.27         |
| FeO <sub>T</sub>               | 0.01–0.03            | 0.91–1.33           | 0.46–0.81       | 0.00–12.55  | 0.08–0.98   | 7.86–8.99         | 8.41–8.79         |

|                                |                   |                    |                    |                   |                    |                  |                   |
|--------------------------------|-------------------|--------------------|--------------------|-------------------|--------------------|------------------|-------------------|
| NiO                            | 0.01–0.05         | n.d.               | n.d.               | n.d.              | n.d.               | 0.33–0.37        | 0.00–0.39         |
| Na <sub>2</sub> O              | n.d.              | n.d.               | n.d.               | 1.82–2.27         | 1.22–2.15          | 0–0.01           | 0.00–0.02         |
| K <sub>2</sub> O               | n.d.              | 0.01–0.09          | n.d.               | 0.01–0.11         | n.d.               | 0.00–0.01        | 0.00–0.01         |
| F                              | n.d.              | n.d.               | n.d.               | 0.03–1.28         | n.d.               | n.d.             | n.d.              |
| Data source                    | [6]               | [7] [8]            | [9]                | [10]              | [11]               | [12]             |                   |
| Garnet                         |                   | Serpentine jade    |                    | Turquoise         |                    | Aquamarine       |                   |
|                                | Jinan of Shandong | Nanminghe of Hebei | Xiuyan of Liaoning | Taian of Shandong | Ma'anshan of Anhui | Fugong of Yunnan | Pingwu of Sichuan |
| SiO <sub>2</sub>               | 36.75–38.09       | 35.66–36.37        | 44.06–44.82        | 41.90–44.70       | 0.00–0.23          | 63.87–66.08      | 63.19             |
| TiO <sub>2</sub>               | 0.64–0.87         | 0.00–0.03          | n.d.               | 0.00–0.23         | 0.00–0.10          | 0.00–0.05        | 0.01              |
| Al <sub>2</sub> O <sub>3</sub> | 10.40–12.19       | 0.38–0.71          | 0.16–0.22          | 0.05–0.65         | 36.56–39.94        | 16.55–17.49      | 17.31             |
| P <sub>2</sub> O <sub>5</sub>  | n.d.              | n.d.               | 0.07–0.09          | n.d.              | 37.15–39.95        | 0.00–0.04        | n.d.              |
| Cr <sub>2</sub> O <sub>3</sub> | 0.00–0.03         | 0.00–0.02          | n.d.               | n.d.              | n.d.               | 0.00–0.06        | n.d.              |
| BeO                            | n.d.              | n.d.               | n.d.               | n.d.              | n.d.               | n.d.             | n.d.              |
| MgO                            | 0.02–0.04         | 0.66–0.78          | 40.65–41.95        | 35.95–41.46       | 0.00–0.03          | 0.00–0.37        | 0.07              |
| CaO                            | 35.40–35.83       | 32.14–32.71        | 0.07–0.18          | 0.00–0.09         | 0.02–0.13          | 0.00–0.01        | 0.30              |
| CuO                            | n.d.              | n.d.               | n.d.               | n.d.              | 1.55–9.24          | n.d.             | n.d.              |
| MnO                            | 0.14–0.17         | 0.03–0.16          | 0.01–0.05          | 0.00–0.18         | n.d.               | 0.00–0.05        | n.d.              |
| FeO <sub>T</sub>               | 11.68–14.64       | 27.74–28.33        | 0.37–1.65          | 1.35–9.44         | 0.07–2.32          | 0.16–0.63        | 0.21              |
| Na <sub>2</sub> O              | n.d.              | n.d.               | 0.11–0.12          | 0.00–0.31         | 0.00–0.16          | 0.20–0.72        | 1.47              |
| K <sub>2</sub> O               | n.d.              | n.d.               | 0.10–0.12          | 0.00–0.14         | 0.01–0.14          | 0.00–0.05        | 0.09              |
| Data source                    | [13]              | [14]               | [15]               | [16]              | [17]               | [18]             | [19] [20] [21]    |

Note: n.d. = not detected.

**Table S3.** Representative Electron microprobe analysis (EPMA) of different nephrite jade from Xinjiang province, China.

| Location                       | Xinjiang |         |         |        |        |        |        |        |          |        |         |         |
|--------------------------------|----------|---------|---------|--------|--------|--------|--------|--------|----------|--------|---------|---------|
|                                | Hetian   |         |         | Yutian |        |        | Qiemo  |        | Ruoqiang |        | Manasi  |         |
| Sample                         | MYH-1-1  | MYH-1-2 | MYH-1-3 | YT-1-1 | YT-1-2 | YT-1-3 | QM-1-1 | QM-1-2 | RQ-1-1   | RQ-1-2 | MNS-1-1 | MNS-1-2 |
| P <sub>2</sub> O <sub>5</sub>  | n.d.     | n.d.    | n.d.    | n.d.   | n.d.   | n.d.   | n.d.   | n.d.   | n.d.     | n.d.   | n.d.    | n.d.    |
| SiO <sub>2</sub>               | 57.74    | 57.67   | 56.38   | 58.01  | 56.88  | 58.49  | 58.59  | 58.28  | 58.34    | 58.77  | 57.11   | 57.20   |
| TiO <sub>2</sub>               | 0.01     | n.d.    | 0.01    | 0.01   | 0.00   | 0.04   | 0.00   | 0.05   | 0.00     | 0.00   | 0.00    | 0.05    |
| Al <sub>2</sub> O <sub>3</sub> | 0.70     | 0.65    | 0.63    | 0.29   | 0.49   | 0.67   | 0.75   | 1.68   | 0.76     | 0.72   | 0.23    | 0.64    |
| Cr <sub>2</sub> O <sub>3</sub> | n.d.     | 0.02    | n.d.    | 0.05   | 0.03   | 0.99   | 0.01   | 0.02   | 0.00     | 0.00   | 0.05    | 0.05    |
| FeO                            | 0.65     | 0.96    | 4.31    | 0.41   | 1.09   | 0.00   | 0.36   | 0.22   | 0.97     | 0.98   | 3.87    | 6.24    |
| MnO                            | 0.06     | 0.05    | 0.06    | 0.08   | 0.08   | 0.06   | 0.04   | 0.11   | 0.09     | 0.08   | 0.23    | 0.17    |
| MgO                            | 22.95    | 22.78   | 20.68   | 24.02  | 23.02  | 22.62  | 24.42  | 24.23  | 24.09    | 23.75  | 23.52   | 19.66   |
| CaO                            | 12.90    | 12.50   | 12.95   | 12.90  | 13.11  | 13.24  | 13.08  | 13.38  | 12.93    | 12.82  | 12.77   | 12.86   |
| Na <sub>2</sub> O              | 0.08     | 0.11    | 0.07    | 0.09   | 0.00   | 0.06   | 0.16   | 0.23   | 0.09     | 0.10   | 0.03    | 0.07    |
| K <sub>2</sub> O               | 0.03     | 0.09    | n.d.    | 0.06   | 0.13   | 0.03   | 0.08   | 0.12   | 0.14     | 0.08   | 0.02    | 0.04    |
| Total                          | 95.11    | 94.88   | 95.12   | 95.92  | 94.83  | 96.20  | 97.48  | 98.40  | 97.42    | 97.33  | 97.93   | 97.04   |
| Na <sup>+</sup>                | 0.02     | 0.03    | 0.02    | 0.02   | 0.00   | 0.02   | 0.04   | 0.06   | 0.14     | 0.04   | 0.01    | 0.02    |
| Mg <sup>2+</sup>               | 4.78     | 4.76    | 4.38    | 4.91   | 4.81   | 4.67   | 4.94   | 4.87   | 4.90     | 4.82   | 4.83    | 4.10    |
| Al <sup>3+</sup>               | 0.12     | 0.11    | 0.11    | 0.05   | 0.07   | 0.11   | 0.12   | 0.27   | 0.12     | 0.12   | 0.04    | 0.11    |
| K <sup>+</sup>                 | 0.01     | 0.02    | n.d.    | 0.01   | 0.02   | 0.01   | 0.01   | 0.02   | 0.03     | 0.01   | 0.00    | 0.01    |

Note: n.d. = not discernible. All the original data were summarized from [22][23][24][25][26][27][28].

**Table S4.** Representative Electron microprobe analysis (EPMA) of different nephrite jade from other locations, China.

[illegible]

|                                                         |      |      |      |      |      |      |      |      |      |      |      |      |      |      |      |
|---------------------------------------------------------|------|------|------|------|------|------|------|------|------|------|------|------|------|------|------|
| Ba <sup>2+</sup>                                        | n.d. | 0.00 | 0.00 |
| Cr <sup>3+</sup>                                        | 0.03 | 0.01 | 0.00 | 0.02 | 0.04 | 0.02 | 0.00 | 0.00 | 0.00 | 0.00 | 0.00 | 0.00 | 0.00 | 0.00 | 0.01 |
| Mn <sup>2+</sup>                                        | 0.00 | 0.01 | 0.00 | 0.00 | 0.01 | 0.01 | 0.01 | 0.00 | 0.00 | 0.01 | 0.01 | 0.01 | 0.02 | 0.02 | 0.02 |
| Ni <sup>2+</sup>                                        | n.d. | n.d. | n.d. | n.d. | n.d. | n.d. | 0.00 | 0.00 | 0.00 | 0.01 | 0.00 | 0.00 | n.d. | n.d. | n.d. |
| Mg <sup>2+</sup> /(Mg <sup>2+</sup> +Fe <sup>2+</sup> ) | 0.95 | 0.90 | 0.95 | 0.92 | 0.87 | 0.91 | 0.99 | 1.00 | 0.97 | 0.98 | 0.98 | 0.98 | 0.98 | 0.98 | 0.98 |

Note: n.d. = not discernible. All the original data were summarized from [29][30][31][32][33].

**Author Contributions:** Conceptualization, X.-Y.Y. and Z.-Y.L.; methodology, X.-Y.Y., Z.-Y.L., Y.Z., and L.-J.Q.; data curation L.-J.Q.; writing—original draft preparation, all authors; writing—review and editing, X.-Y.Y., Z.-Y.L., Y.Z., C.Z. and L.-J.Q.; supervision, X.-Y.Y.; funding acquisition, X.-Y.Y. All authors have read and agreed to the published version of the manuscript.

**Funding:** This study was financially supported by the project from the China Geological Survey (DD20190379-88).

**Acknowledgments:** We appreciate Fei Liu, Na-Li Sha, Jian-Jun Li, He-Jun Li, Jun-Ping Chen, Zhi-Yuan Chu, Han-Dong Zhang, Mao-Yong Li, Guo Chen and the Turquoise Culture Research Association, Zhushan, Hubei, China, for their assistance during field survey. We owe thanks to Yan Ao, Jun-Chao Shi, Yong-Feng Wang, Yu Zhang, and Lin-Su Lv for providing samples and photographs of gemstone.

**Conflicts of Interest:** The authors declare that they have no known competing financial interests or personal relationships that could have appeared to influence the work reported in this paper.

## References

- Marshall, D.; Pardieu, V.; Loughrey, L.; et al. Conditions for emerald formation at Davdar, China: fluid inclusion, trace element and stable isotope studies. *J. Mineral. Mag.* 2012, 76, 213–226; DOI: 10.1180/minmag.2012.076.1.213.
- Xu, C. Study on the Gemological and mineralogical Characteristic of Vanadium Rich Emeralds from Malipo YunNan. Master Thesis, China University of Geosciences, Beijing, China, 2016. (in Chinese with English abstract).
- Huang, W.Q. Mineralogical and fluid inclusion study on the Malipo emerald deposit in Yunnan Province, China. Master Thesis, Nanjing University, 2014. (in Chinese with English abstract).
- Pan, H.H. Gemological and mineralogical Characteristic of Malipo Emerald from Yunnan Province. Master Thesis, China University of Geosciences, Beijing, China, 2016. (in Chinese with English abstract).
- Zheng, Y.Y. Characteristics of channel water spectrum and origin traceability of Dayakou emerald in Yunnan. Master Thesis, China University of Geosciences, Beijing, China, 2020. (in Chinese with English abstract).
- Liu, L.; Yang, M.X.; Lu, R.; Shen, X.T.; He, C. Study on EDXRF Method of Turquoise Composition. *J. Spectrosc. Spectr. Anal.* 2018, 38(06), 1910–1916. (in Chinese with English abstract).
- Yu, X.Y.; Wu, G.Z.; He, X.M. Color forming mechanism and improvement of sapphire in Shandong. *J. Deposit geology.* 1996, 15(S1), 153–157. (in Chinese).
- Ding, Z.H. Genesis of Megacrystal Corundum from Shandong Province-Evidence from Mineral Inclusions. *J. Acta Mineral. Sin.* 2009, 29(04), 442–446; DOI: 10.16461/j.cnki.1000-4734.2009.04.004. (in Chinese with English abstract).
- Song, S. Analysis on the Production Characteristics and Genesis of Plain Corundum from Fuping, Hebei Province. Master Thesis, China University of Geosciences, Beijing, China, 2015. (in Chinese with English abstract).
- Kang, W.R. Gemstone mineralogy and fluid inclusion of keketuohai Tourmaline from Xinjiang. Master Thesis, China University of Geosciences, Beijing, China, 2017. (in Chinese with English abstract).
- Zhang, L.J. Characteristics and quality evaluation of tourmaline in Guangxi, Yunnan and Inner Mongolia. *J. Superhard Mater. Eng.* 1997, 01, 57–59. (in Chinese with English abstract).
- Chen, C. Study on the Mineralogical Characteristic of olivine in Jilin Dunhua. Master Thesis, China University of Geosciences, Beijing, China, 2020; DOI : 10.27493/d.cnki.gzdzy.2020.001249 (in Chinese with English abstract).
- Chen, Y.M.; Yu, X.Y.; Yang, Y.; Ruan, C.T. A study of gemological and mineralogical characteristics and color zonation of garnets from Jinan, Shandong Province. *J. Acta Petrol. Mineral.* 2021, 40(03), 581–592. (in Chinese with English abstract).
- Ruan, C.T. The Gem-Mineralogy Characteristics of Garnet in the Nanminghe Skarn Iron Deposit in Wuan, Hebei. Master Thesis, China University of Geosciences, Beijing, China, 2020; DOI: 10.27493/d.cnki.gzdzy.2020.000713. (in Chinese with English abstract).
- Wang, S.Q.; Zhao, C.H.; Yu, G.; Yuang, X.M.; Duan, T.Y. China xiuyan jade. Science Press, Beijing, 2007, 13–14.

16. Hou, X.; Wu, R.H.; Wang, S.Q. Mineralogical and petrological characteristics of taishan jade. *J. Acta Petrol. Mineral.* 2011, 30, 169–174. (in Chinese with English abstract).
17. Li, Z.C. Mineralogical Characteristics and Spectral Characterization of Turquoise from Maanshan, Anhui Province. Master Thesis, China University of Geosciences, Beijing, China, 2019. DOI: 10.27493/d.cnki.gzdzy.2019.001331. (in Chinese with English abstract)
18. Ding, P. Study on Mineralogical Characteristic and Fluid Inclusions of Aquamarine from Fugong, Yunnan Province. Master Thesis, China University of Geosciences, Beijing, China, 2012. (in Chinese with English abstract).
19. Peng, M.S.; Zheng, C.S.; Wen, Y.K.; Yang, B.B. Spectroscopic Studies of Aquamarine from Altay. *J. Acta Mineral. Sin.* 1985, 02, 140–146; DOI: 10.16461/j.cnki.1000-4734.1985.02.007. (in Chinese with English abstract).
20. Wang, P.; Pan, Z.C.; Weng, L.B. Systematic Gemmology. Geological Publishing House, Beijing, 1987.
21. Liu, Y.; He, M.Y.; Zhang, D.L.; Yu, X.Y.; Pan, Z.L. Gemmology of Beryl from Pingwu, Sichuan Province. *J. Gems Gemmol.* 2001, 03, 31–34; DOI: 10.15964/j.cnki.027jgg.2001.03.007. (in Chinese with English abstract).
22. Liu, Y.; Deng, J.; Shi, G.H.; Lu, T.J.; He, H.Y.; Ng, Y.N.; Shen, C.H.; Yang, L.Q.; Wang, Q.F. Chemical Zone of Nephrite in Alamas, Xinjiang, China. *J. Resource Geology.* 2010, 60(3), 249–259; DOI: 10.1111/j.1751-3928.2010.00135.x.
23. Liu, Y.; Deng, J.; Shi, G.H.; Yu, T.F.; Zhang, G.B.; et al. Geochemistry and petrology of nephrite from Alamas, Xinjiang, NW China. *J. Journal of Asian Earth Sciences.* 2011, 42(3), 440–451; DOI: 10.1016/j.jseas.2011.05.012.
24. Liu, Y.; Deng, J.; Shi, G.H.; Sun X.; Yang, L. Geochemistry and petrogenesis placer nephrite from Hetian, Xinjiang Northwest China. *J. Ore Geol. Rev.* 2011, 41(1), 122–132; DOI: 10.1016/j.oregeorev.2011.07.004.
25. Liu, Y.; Zhang, R.; Zhang, Z.; Shi, G.H.; Zhang, Q.; Anuduwayiti, M.; Liu, J. Mineral inclusions and SHRIMP U–Pb dating of zircons from the Alamas nephrite and granodiorite: Implications for the genesis of a magnesian skarn deposit. *J. Lithos.* 2015, 212–215; 128–144; DOI: 10.1016/j.lithos.2014.11.002.
26. Gao, K.; Shi, G.H.; Wang, M.L.; Xie, G.; Wang, J.; Zhang, X.C.; Fang, T.; Lei, W.Y.; Liu, Y. The Tashisayi nephrite deposit from South Altyn Tagh, Xinjiang, northwest China. *J. Geosci. Front.* 2019, 10(4), 1597–1612; DOI: 10.1016/j.gsf.2018.10.008.
27. Jiang, Y.; Shi, G.H.; Xu, L.G.; Li, X.L. Mineralogy and Geochemistry of Nephrite Jade from Yinggelike Deposit, Altyn Tagh (Xinjiang, NW China). *J. Minerals.* 2020, 10(5), 418; DOI: 10.3390/min10050418.
28. Zhang, X.M. Mineralogy and Genesis of Green Nephrite in the Western Section of Manas Region, Xinjiang. Master Thesis, China University of Geosciences, Beijing, 2020; DOI: 10.27493/d.cnki.gzdzy.2020.000059. (in Chinese with English abstract).
29. Ling, X.X.; Schmädicke, E.; Qiu, L.L.; Gose, J.; Wu, R.H.; Wang, S.Q.; Liu, Y.; Tang, G.Q.; Li, X.H. Age determination of nephrite by in-situ SIMS U–Pb dating syngenetic titanite: A case study of the nephrite deposit from Luanchuan, Henan, China. *J. Lithos.* 2015, 220–223; 289–299; DOI: 10.1016/j.lithos.2015.02.019.
30. Zhang, C.; Yu, X.Y.; Jiang, T.L. Mineral association and graphite inclusions in nephrite jade from Liaoning, northeast of China: Implications for metamorphic conditions and ore genesis. *J. Geosci. Front.* 2019, 10(2), 425–437; DOI: 10.1016/j.gsf.2018.02.009.
31. Zhang, H.Q. Gemology, Mineralogy and Trace Element Study on Green Nephrite from Qinghai Province. Master Thesis, China University of Geosciences, Beijing, 2019; DOI: (in Chinese with English abstract).
32. Bai, F.; Du, J.M.; Li, J.J.; Jiang, B.H. Mineralogy, geochemistry, and petrogenesis of green nephrite from Dahua, Guangxi, Southern China. *J. Ore Geol. Rev.* 2020, 118; DOI: 10.1016/j.oregeorev.2020.103362.
33. Zhang, C.; Yu, X.Y.; Yang, F.; Santosh, M.; Huo, D. Petrology and geochronology of the Yushigou nephrite jade from the North Qilian Orogen, NW China: Implications for subduction-related processes. *J. Lithos.* 2021, 380–381; DOI: 10.1016/j.lithos.2020.105894.
